# Supplementary material for: Intercalibration of ASCAT Scatterometer Winds from MetOp-A, -B, and -C, for a Stable Climate Data Record
Source: MDPI journal article supplement (doi:10.3390/rs13183678), 2021-09-15
Supplement: s1 [file s1]

Archive with 1 entries (1 files):
- remotesensing-1349742-supplementary.pdf
